# Supplementary material for: RPN2 is effective biomarker to predict the outcome of combined chemotherapy docetaxel and cisplatin for advanced gastric cancer
Source: PubMed Central journal article supplement (PMC5880597; doi:10.18632/oncotarget.24622), 2018-03-08
Supplement: oncotarget-09-15208-s001.pdf [file oncotarget-09-15208-s001.pdf]

## RPN2 is effective biomarker to predict the outcome of combined chemotherapy docetaxel and cisplatin for advanced gastric cancer

### SUPPLEMENTARY MATERIALS

**Supplementary Table 1: Histological evaluation criteria of tumor response after preoperative therapy**

|                              |                              |                                                                                                         |
|------------------------------|------------------------------|---------------------------------------------------------------------------------------------------------|
| Grade0                       | (no effect)                  | No evidence of effect.                                                                                  |
| Grade1                       | (slight effect)              |                                                                                                         |
|                              | Grade1a (very slight effect) | Viable tumor cells occupy more than 2/3 of the tumorous area.                                           |
|                              | Grade1b (slight effect)      | Viable tumor cells remain in more than 1/3 but less than 2/3 of the tumorous area.                      |
| Grade2 (considerable effect) |                              | Viable tumor cells remain in less than 1/3 of the tumorous area.                                        |
| Grade3 (complete response)   |                              | No viable tumor cells remain. It is recommended that the finding is confirmed on additional sectioning. |
